# Supplementary material
Source: PubMed Central journal article supplement (PMC7314586)
Supplement: ofaa220_suppl_supplementary_table_s1.pdf [file ofaa220_suppl_supplementary_table_s1.pdf]

265 **Table S1. Clinical characteristics of the five patients with COVID-19 and secondary bacterial co-infection**

| Patients | Age | Sex | Ward | Organisms (s)                                                         | Comorbidity                          | Charlson index | Invasive procedures | Time from ICU admission to bacterial infection onset, (days) | Time from MV start to bacterial infection onset, (days) | Antiviral treatment                                             |
|----------|-----|-----|------|-----------------------------------------------------------------------|--------------------------------------|----------------|---------------------|--------------------------------------------------------------|---------------------------------------------------------|-----------------------------------------------------------------|
| 1        | 66  | F   | ICU  | <i>E. coli</i> ,<br><i>B. cepacia</i>                                 | None                                 | 2              | MV, ECMO            | 13                                                           | 13                                                      | Arbidol+<br>lopinavir/ritonavir                                 |
| 2        | 90  | M   | ICU  | <i>K. pneumoniae</i>                                                  | CHD, FL, CKD                         | 13             | MV, ECMO            | 6                                                            | 2                                                       | Arbidol+<br>lopinavir/ritonavir+<br>interferon alpha inhalation |
| 3        | 59  | M   | ICU  | <i>C. albicans</i> ,<br><i>P. aeruginosa</i> ,<br><i>A. fumigatus</i> | Post status of liver transplantation | 4              | MV, ECMO,<br>BAL    | 9                                                            | 7                                                       | Arbidol+<br>lopinavir/ritonavir+<br>interferon alpha inhalation |
| 4        | 70  | M   | ICU  | <i>S. maltophilia</i>                                                 | Hypertension,<br>Diabetes            | 4              | MV, ECMO            | 9                                                            | 4                                                       | Arbidol+Darunavir                                               |
| 5        | 62  | M   | ICU  | <i>B. cepacia</i>                                                     | Hypertension,<br>Colon cancer        | 4              | MV                  | 18                                                           | 17                                                      | Arbidol+<br>lopinavir/ritonavir                                 |

266 Abbreviation: F, female; M, male; ICU, intensive care unit; CHD, coronary heart disease; FL, fatty liver; CKD, chronic kidney disease; MV,

267 mechanical ventilation; ECMO, extra-corporeal membrane oxygenation; BAL, bioartificial liver.

268 *E. coli* = *Escherichia coli*, *B. cepacia* = *Burkholderia cepacia*, *K. pneumoniae* = *Klebsiella pneumoniae*, *P. aeruginosa* = *Pseudomonas*

269 *aeruginosa*, *C. albicans* = *Candida albicans*, *A. fumigatus* = *Aspergillus fumigatus*, *S. maltophilia* = *Stenotrophomonas maltophilia*.
